# Supplementary material for: Sn-doped 3D ATO inverse opal/hematite hierarchical structures: facile fabrication and efficient photoelectrochemical performance
Source: Royal Society of Chemistry journal article supplement (doi:10.1039/c8ra06504g), 2018-01-01
Supplement: c8ra06504g1.pdf [file c8ra06504g1.pdf]

# Supporting Information

## Sn-doped 3D ATO Inverse Opal/Hematite Hierarchical Structures: Facile Fabrication and Efficient Photoelectrochemical performance

Junjie Zhang, Jing Li, Boxue Zhang, Jianfeng Ye, Yun Wang\* and Xiaozhou Ye\*

Department of Chemistry, College of Science, Huazhong Agricultural University,

Wuhan 430070, China

\* To whom correspondence should be addressed. E-mail: xzye@mail.hzau.edu.cn,  
yunwang123@126.com

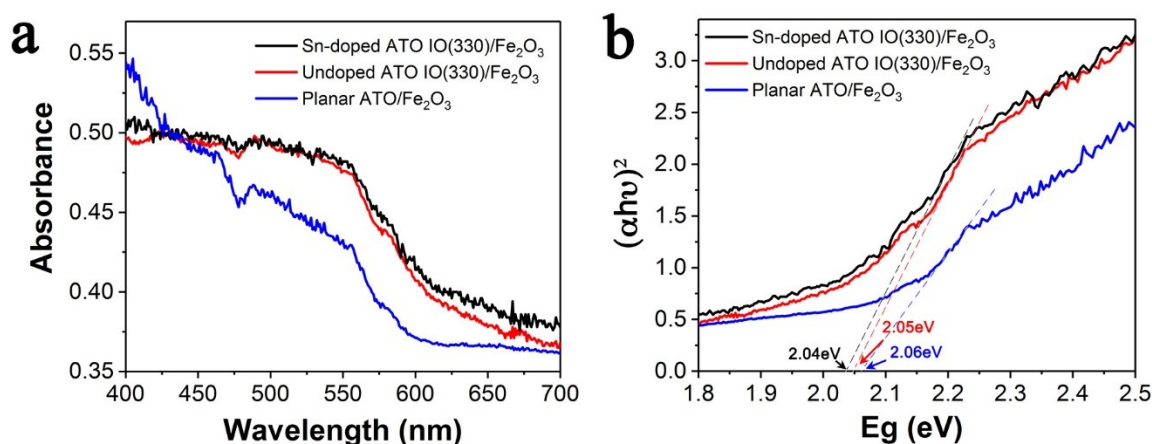

**FigS1.** (a) Diffuse reflectance UV-Vis absorption and (b) Tauc-Plots of Sn-doped and undoped ATO IO(330)/Fe<sub>2</sub>O<sub>3</sub> sample and planar control sample.

**Table S1** Comparison of PEC performances of reported Fe<sub>2</sub>O<sub>3</sub> based nanostructured photoanodes

| Fe <sub>2</sub> O <sub>3</sub> based nanostructured photoanodes | Preparation of Fe <sub>2</sub> O <sub>3</sub> | J <sub>1.23</sub> [mA/cm <sup>2</sup> ] <sup>a)</sup> | Ref. |
|-----------------------------------------------------------------|-----------------------------------------------|-------------------------------------------------------|------|
| Sn-doped Fe <sub>2</sub> O <sub>3</sub> Nanowires               | hydrothermal                                  | 0.45                                                  | 1    |
| Sn-doped Fe <sub>2</sub> O <sub>3</sub> films                   | nonpolar organic solution process approach    | 1.05                                                  | 2    |
| Sn-doped Fe <sub>2</sub> O <sub>3</sub> nanorod arrays          | hydrothermal                                  | 1.00                                                  | 3    |
| 3D FTO IO @ Fe <sub>2</sub> O <sub>3</sub>                      | hydrothermal                                  | 0.46                                                  | 4    |
| Fe <sub>2</sub> O <sub>3</sub> /graphene IO                     | Chemical bath deposition                      | 1.62 mA/cm <sup>2</sup> at 1.5V vs. RHE               | 5    |
| Fe <sub>2</sub> O <sub>3</sub> /ITO IO                          | ALD                                           | 1.60 mA/cm <sup>2</sup> at 1.53 V vs. RHE             | 6    |
| 3D ATO/ Fe <sub>2</sub> O <sub>3</sub> nanorods                 | hydrothermal                                  | 1.10                                                  | 7    |

a): Unless otherwise specified, the photocurrent density is collected at 1.23V vs. RHE with AM 1.5G illumination(100 mW/cm<sup>2</sup>) in 1M NaOH.

## Reference

1. M. Li, Y. Yang, Y. Ling, W. Qiu, F. Wang, T. Liu, Y. Song, X. Liu, P. Fang, Y. Tong and Y. Li, *Nano Lett.*, 2017, **17**, 2490-2495.
2. J.-J. Wang, Y. Hu, R. Toth, G. Fortunato and A. Braun, *J. Mater. Chem. A*, 2016, **4**, 2821-2825.
3. A. Subramanian, E. Gracia-Espino, A. Annamalai, H. H. Lee, S. Y. Lee, S. H. Choi and J. S. Jang, *Appl. Surf. Sci.*, 2018, **427**, 1203-1212.
4. C. Xiaobo, Z. Haifeng and C. Chuanwei, *Semicond. Sci. Tech.*, 2017, **32**, 114003.
5. K.-Y. Yoon, J.-S. Lee, K. Kim, C. H. Bak, S.-I. Kim, J.-B. Kim and J.-H. Jang, *ACS Appl. Mater. Inter.*, 2014, **6**, 22634-22639.
6. S. C. Riha, M. J. DeVries Vermeer, M. J. Pellin, J. T. Hupp and A. B. F. Martinson, *ACS Appl. Mater. Inter.*, 2013, **5**, 360-367.
7. X. Yang-Fan, R. Hua-Shang, C. Bai-Xue, L. Ying, C. Hong-Yan, K. Dai-Bin and S. Cheng-Yong, *Adv. Sci.*, 2015, **2**, 1500049.
